# Supplementary material for: Engineering a ternary one-dimensional Fe2P@SnP0.94@MoS2 mesostructure through magnetic-field-induced self-assembly as a high-performance lithium-ion battery anode
Source: Royal Society of Chemistry journal article supplement (doi:10.1039/d2cc00230b), 2022-01-01
Supplement: d2cc00230b1.pdf [file d2cc00230b1.pdf]

Electronic Supplementary Information (ESI) for Chemical Communications. This journal is (c) The Royal Society of Chemistry 2022.

## Electronic Supplementary Information (ESI)

### **Engineering a ternary one-dimensional Fe<sub>2</sub>P@SnP<sub>0.94</sub>@MoS<sub>2</sub> mesostructure through magnetic field-induced self-assembly as high-performance lithium-ion battery anode**

Jinyun Liu<sup>a,\*</sup>, Ting Zhou<sup>a</sup>, Tianli Han<sup>a</sup>, Liying Zhu<sup>a</sup>, Yan Wan<sup>a</sup>, Yunfei Hu<sup>b,\*</sup>, Zhonghua Chen<sup>c,\*</sup>

#### **Experimental**

**Chemicals:** FeCl<sub>3</sub>·6H<sub>2</sub>O, urea, sodium hypophosphite (NaH<sub>2</sub>PO<sub>2</sub>·H<sub>2</sub>O), trisodium citrate dehydrate, and K<sub>2</sub>SnO<sub>3</sub>·3H<sub>2</sub>O were obtained from Aladdin. Tetraethyl silicate (TEOS) was purchased from Macklin. NH<sub>3</sub>·H<sub>2</sub>O, CH<sub>4</sub>N<sub>2</sub>S, Na<sub>2</sub>MoO<sub>4</sub>·2H<sub>2</sub>O, and anhydrous ethanol were purchased from Sinopharm Chemical Reagent Co., Ltd. All chemicals were used directly without further purification.

**Preparation of 1D Fe<sub>3</sub>O<sub>4</sub>@SiO<sub>2</sub>:** The Fe<sub>3</sub>O<sub>4</sub> nanospheres were prepared by dispersing FeCl<sub>3</sub>·6H<sub>2</sub>O (4.3 g), NaAc (4.0 g), and trisodium citrate dehydrate (1.0 g) in 70 ml of ethylene glycol. Then, a transparent solution was transferred into a Teflon-lined stainless steel autoclave and kept in an oven at 200 °C for 10 h. After that, the sample was collected, washed and dried. 0.05 g of Fe<sub>3</sub>O<sub>4</sub> nanospheres were ultrasonically dispersed in 240 mL of anhydrous ethanol, and 30 mL of ammonia was added under a strong mechanical rate (800 rpm) for 10 min. Subsequently, 2 mL of TEOS was slowly added under a low agitation (350 rpm). After stirring for 15 min, the solution was held under an external magnetic field for 100 s. Finally, after standing for 12 h, the 1D Fe<sub>3</sub>O<sub>4</sub>@SiO<sub>2</sub> was synthesized by washing with deionized water and ethanol, and drying at 60 °C for 12 h.

**Preparation of 1D yolk-shell  $Fe_3O_4@void@SnO_2$ :** 0.1 g of the  $Fe_3O_4@SiO_2$  was ultrasonically dispersed in a mixture of 12 mL  $H_2O$  and 18 mL anhydrous ethanol. Then, 0.9 g of urea and 0.12 g of  $K_2SnO_3 \cdot 3H_2O$  were added to the above solution and stirred magnetically for 30 min, which was placed in an autoclave and kept in an oven at 170 °C for 6 h. At last, the  $Fe_3O_4@void@SnO_2$  was obtained by washing several times with deionized water.

**Preparation of  $Fe_2P@SnP_{0.94}$ :** The  $Fe_2P@SnP_{0.94}$  was prepared through a thermal phosphorization. Typically, 0.05 g of  $Fe_3O_4@void@SnO_2$  and 1 g of  $NaH_2PO_2 \cdot H_2O$  were mixed evenly. Then, the mixture was placed in a tubular furnace and calcined at 300 °C for 30 min under Ar gas at a ramping rate of 2 °C per min.

**Preparation of ternary 1D  $Fe_2P@SnP_{0.94}@MoS_2$ :** 0.05 g of  $Fe_2P@SnP_{0.94}$ , 0.154 g of  $Na_2MoO_4 \cdot 2H_2O$ , and 0.4 g of  $CH_4N_2S$  were stirred magnetically in 30 mL of  $H_2O$  for 30 min. Then, the above solution was transferred into an autoclave and kept in an oven at 190 °C for 16 h. After that, the sample was collected, washed and dried for further use.

**Characterization:** A field emission scanning electron microscopy (SEM, Hitachi S-4800), a transmission electron microscopy (TEM, HT-7700), and a X-ray diffractometer (XRD, Bruker D8 Advance) were used to characterize the morphology and phase of the samples. The elemental mapping was tested on an energy dispersive X-ray spectrometer. The different valence states of the final product were detected by X-ray photoelectron spectroscopy tester (XPS, ESCALAB 250). Micromeritics ASAP 2460 analyzer was used to measure the specific surface area and pore-size distribution.

**Electrochemical tests:** The electrochemical properties of  $Fe_2P@SnP_{0.94}@MoS_2$  were analyzed by using CR2032 coin cells, assembling in an Ar glove box ( $H_2O$  and  $O_2$  < 0.01 ppm). The composite (65 w%), conductive carbon black (25 w%) and

carboxymethylcellulose (CMC, 10 w%) in sodium carboxymethylcellulose (SBR) was evenly coated on a Cu foil, drying in a vacuum oven at 80 °C for 24 h, which was cut into a 12 mm-diameter disc. The electrolyte contained with 1 M of LiPF<sub>6</sub> in ethylene carbonate (EC) and ethyl methyl carbonate (EMC, volume ratio=1:1). Li metal was used as the counter electrode. The electrochemical performance of cells was tested on a CT-4008 system (Shenzhen Neware Technology Co., Ltd). An electrochemical workstation (CHI-660D) was used to measured cyclic voltammetry (CV) in the potential range of 0.01-3 V and electrochemical impedance spectra (EIS).

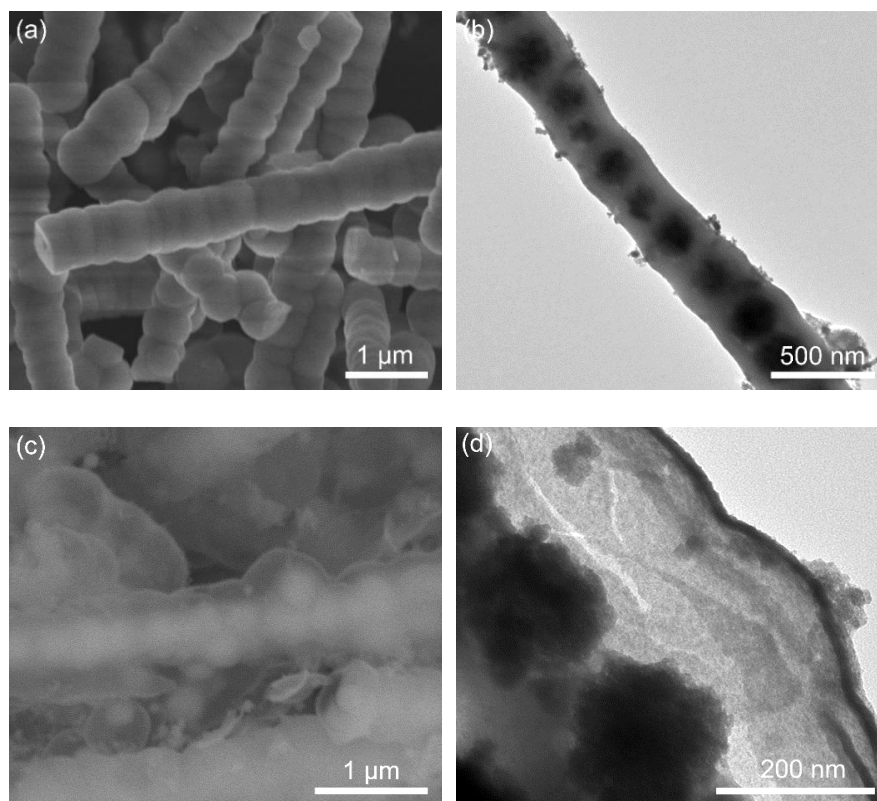

**Fig. S1** (a) SEM and (b) TEM images of Fe<sub>3</sub>O<sub>4</sub>@SiO<sub>2</sub>. (c) SEM and (d) TEM images of 1D Fe<sub>3</sub>O<sub>4</sub>@void@SnO<sub>2</sub>.

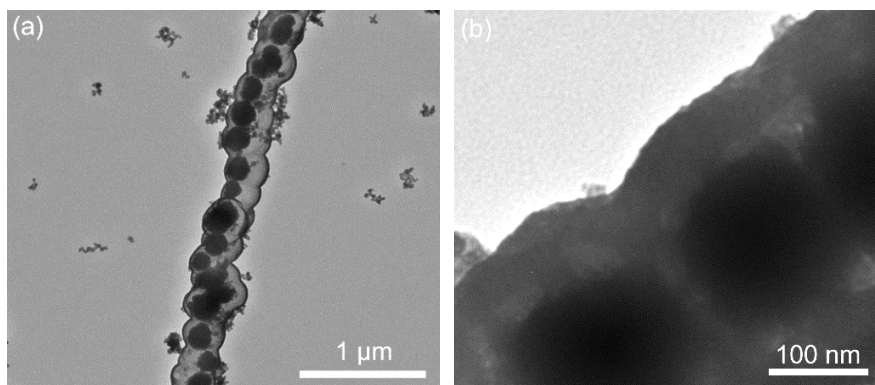

**Fig. S2** (a,b) TEM images of the yolk-shell  $\text{Fe}_2\text{P}@void@SnP_{0.94}$ .

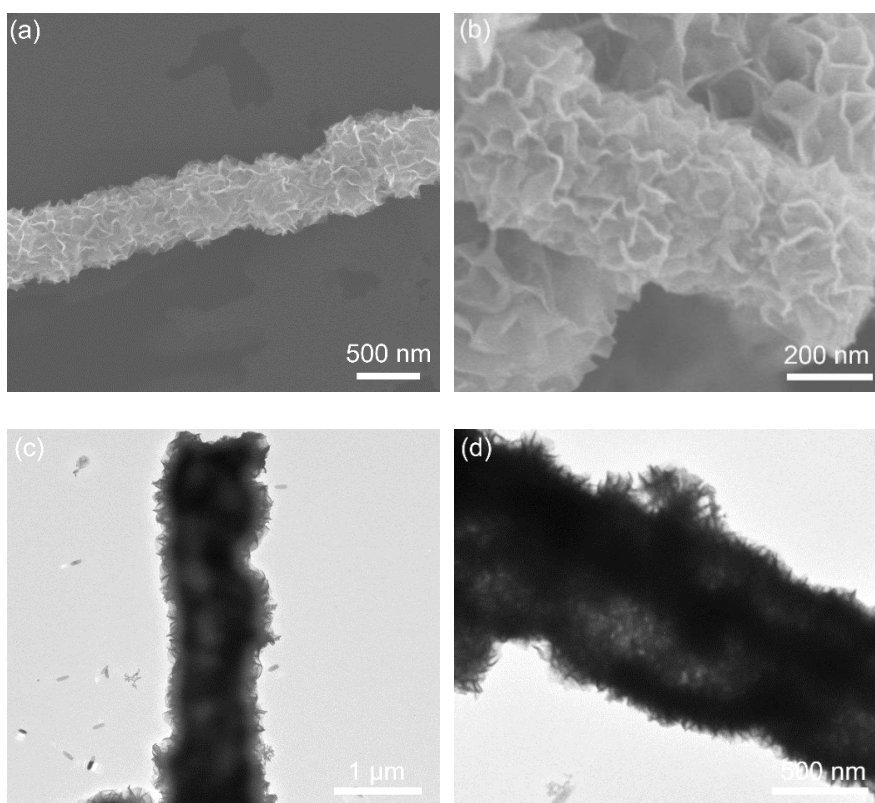

**Fig. S3** (a,b) SEM and (c,d) TEM images of the  $\text{Fe}_2\text{P}@SnP_{0.94}@MoS_2$ .

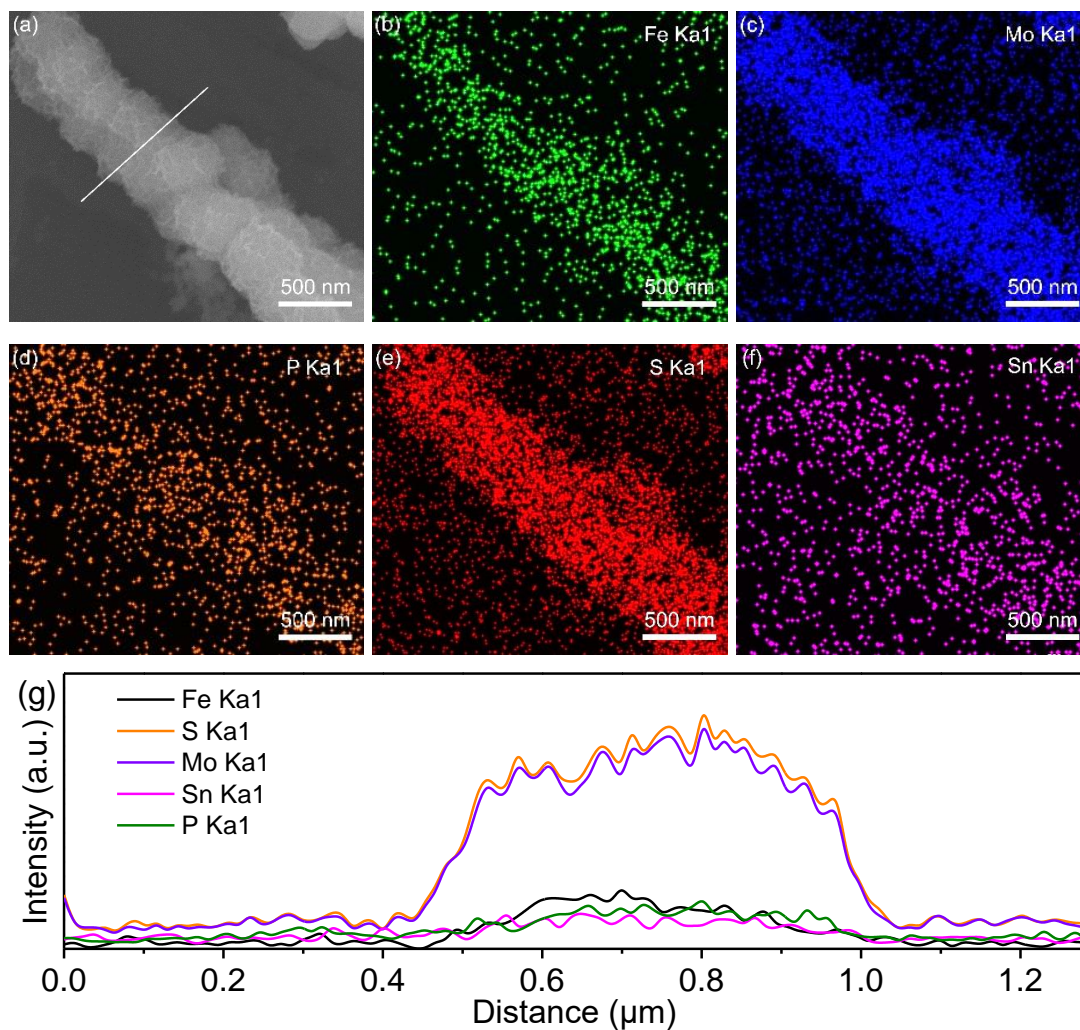

**Fig. S4** (a) SEM and (b-f) mapping images of the  $\text{Fe}_2\text{P}@ \text{SnP}_{0.94}@ \text{MoS}_2$  composite. (g) line-scanning curves.

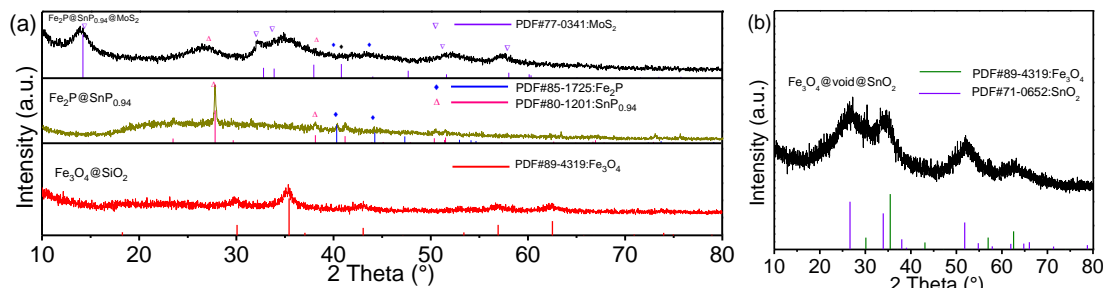

**Fig. S5** (a, b) XRD patterns of each sample.

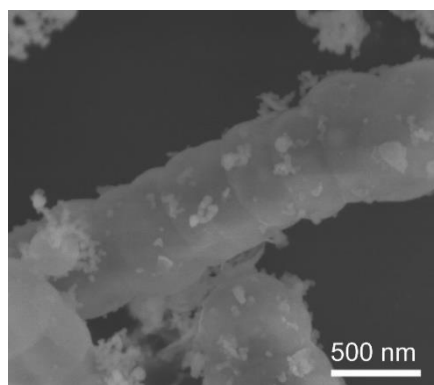

**Fig. S6** SEM image of the  $\text{Fe}_2\text{P}@void@SnP_{0.94}$ .

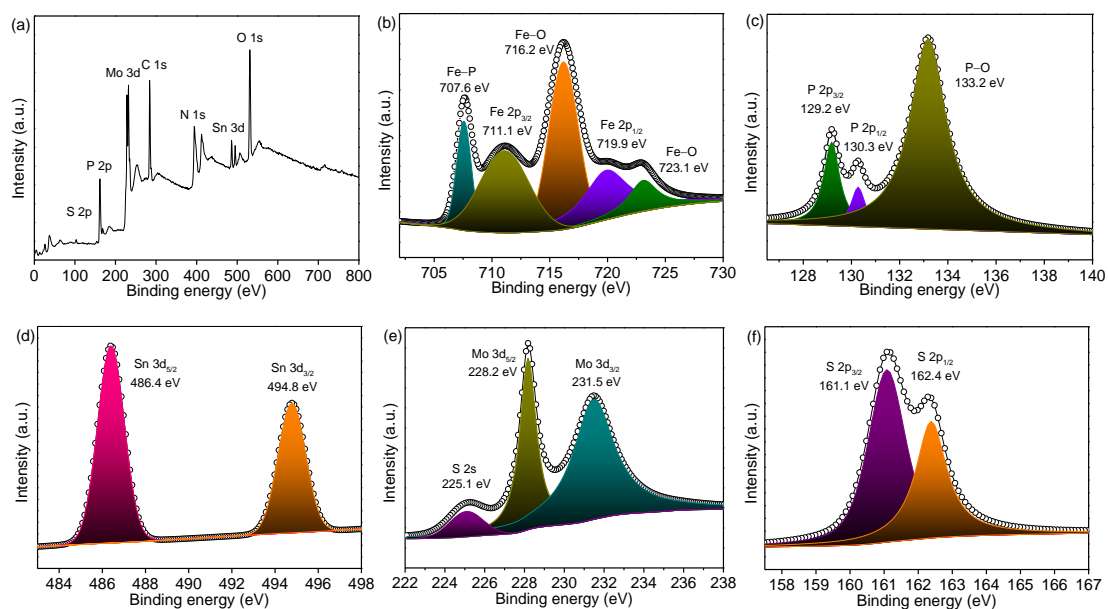

**Fig. S7** (a) XPS spectra of  $\text{Fe}_2\text{P}@SnP_{0.94}@MoS_2$ : (a) survey spectrum, (b) Fe 2p, (c) P 2p, (d) Sn 3d, (e) Mo 3d, and (f) S 2p.

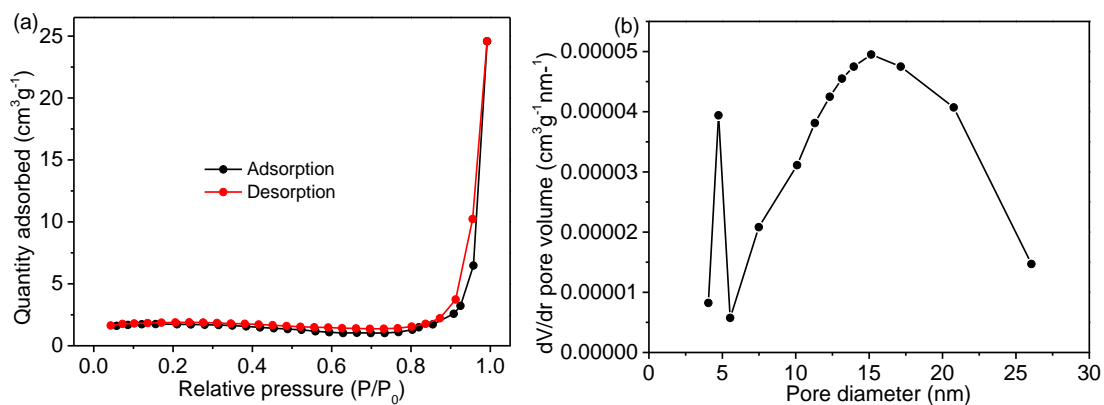

**Fig. S8** (a) The N<sub>2</sub> adsorption-desorption isotherms of the composite. (b) The pore-size distribution.

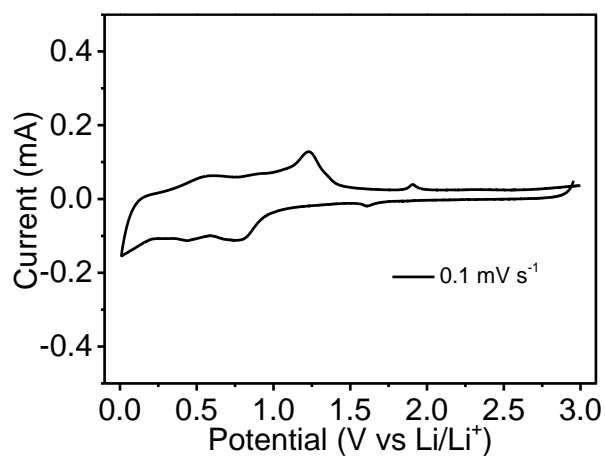

**Fig. S9** CV curve of the Fe<sub>2</sub>P@SnP<sub>0.94</sub> at a scanning speed of 0.1 mV s<sup>-1</sup>.

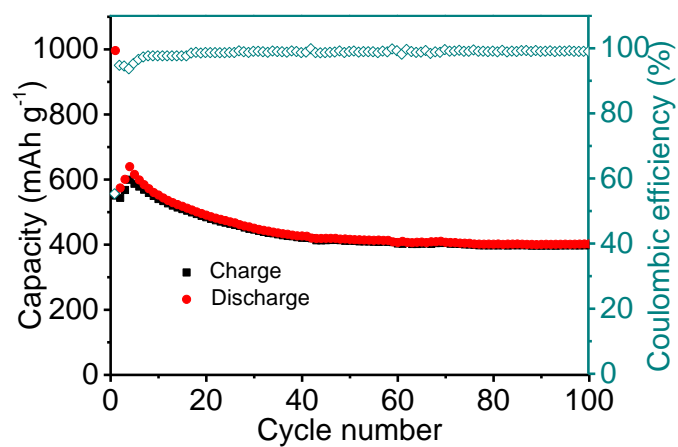

**Fig. S10** Capacity and Coulombic efficiency of Fe<sub>2</sub>P@SnP<sub>0.94</sub> cycling at 2 A g<sup>-1</sup>.

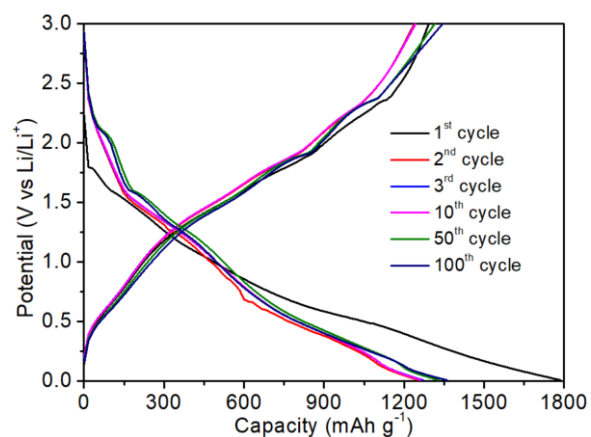

**Fig. S11** (a) Charge-discharge profiles of the  $\text{Fe}_2\text{P}@Sn\text{P}_{0.94}@MoS_2$  composite cycling at  $0.1 \text{ A g}^{-1}$ .

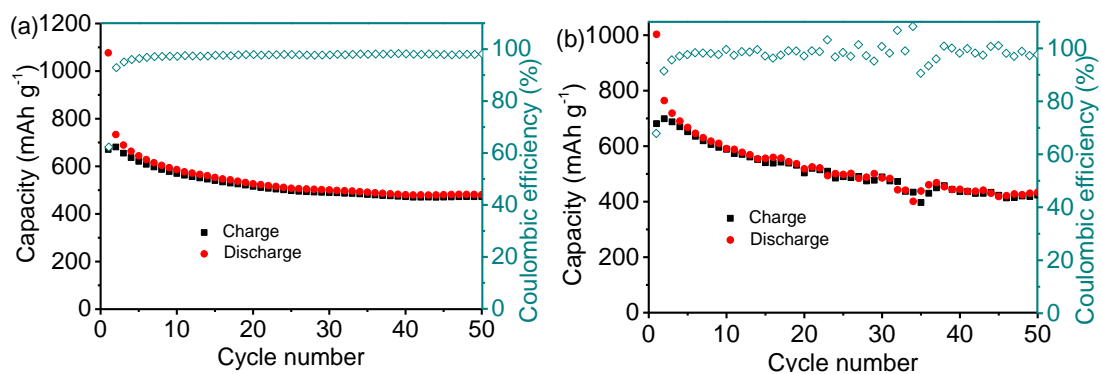

**Fig. S12** Cycling performance and Coulombic efficiency of  $\text{Fe}_2\text{P}@Sn\text{P}_{0.94}$  at charge/discharge rates of (a)  $0.5/1 \text{ A g}^{-1}$  and (b)  $1/0.5 \text{ A g}^{-1}$ .



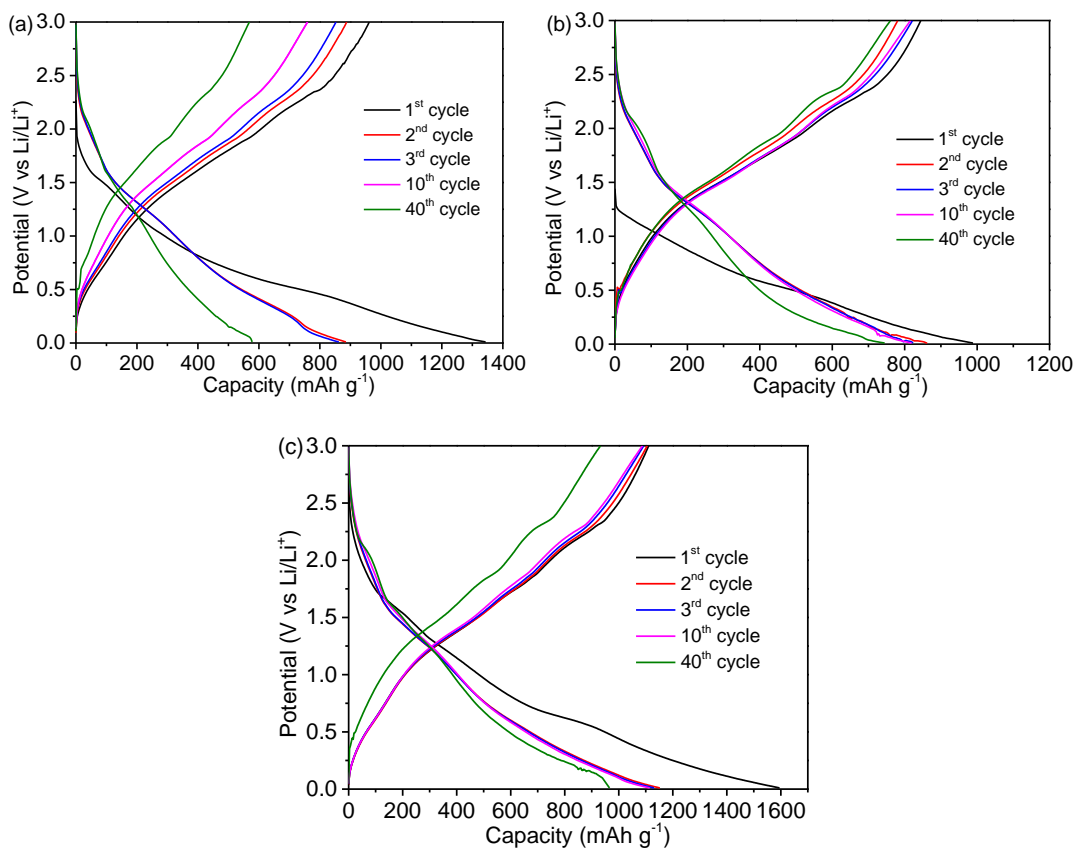

**Fig. S13** Charge-discharge curves of the  $\text{Fe}_2\text{P}@Sn\text{P}_{0.94}@MoS_2$  composite cycling at  $0.2 \text{ A g}^{-1}$  under (a)  $-10 \text{ }^\circ\text{C}$ , (b)  $25 \text{ }^\circ\text{C}$ , and (c)  $45 \text{ }^\circ\text{C}$ .

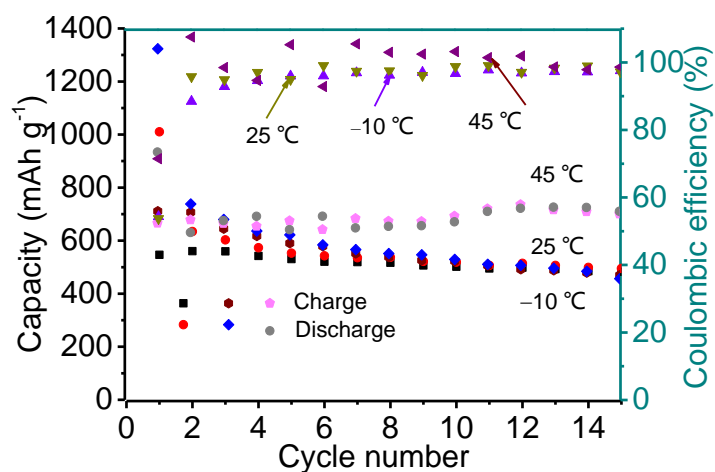

**Fig. S14** Capacities and Coulombic efficiencies of  $\text{Fe}_2\text{P}@Sn\text{P}_{0.94}$  under  $-10 \text{ }^\circ\text{C}$ ,  $25 \text{ }^\circ\text{C}$ , and  $45 \text{ }^\circ\text{C}$  when cycling at  $0.2 \text{ A g}^{-1}$ .

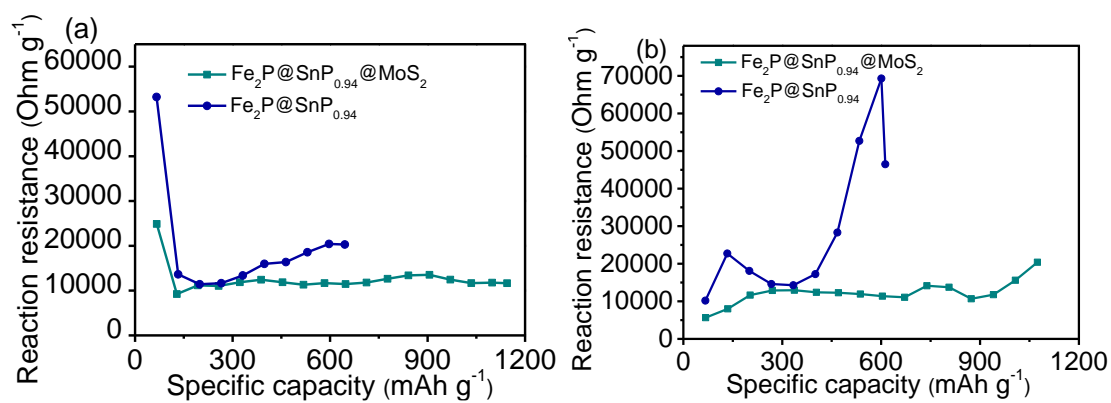

**Fig. S15** *In-situ* reaction resistances at 0.2 A g<sup>-1</sup>: (a) discharging and (b) charging.

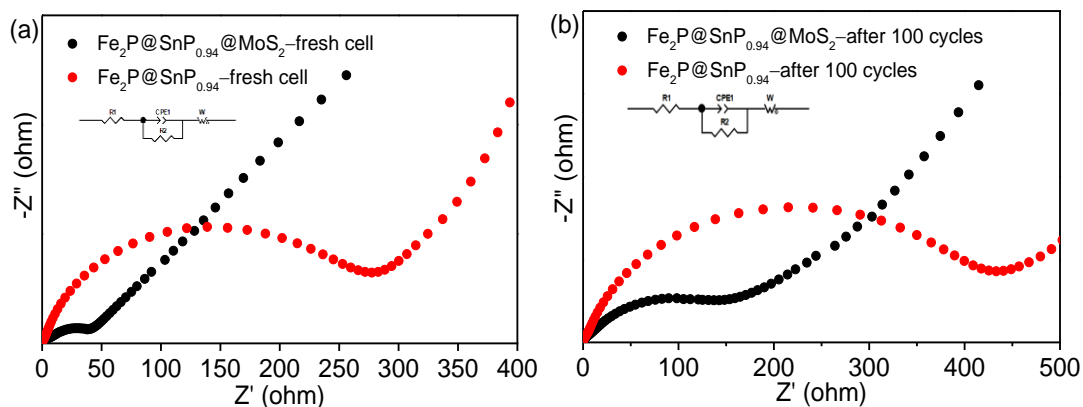

**Fig. S16** EIS spectra of the Fe<sub>2</sub>P@SnP<sub>0.94</sub>@MoS<sub>2</sub> and Fe<sub>2</sub>P@SnP<sub>0.94</sub> (a) before and (b) after 100 cycles at 2 A g<sup>-1</sup>. The inserts display the equivalent circuits.

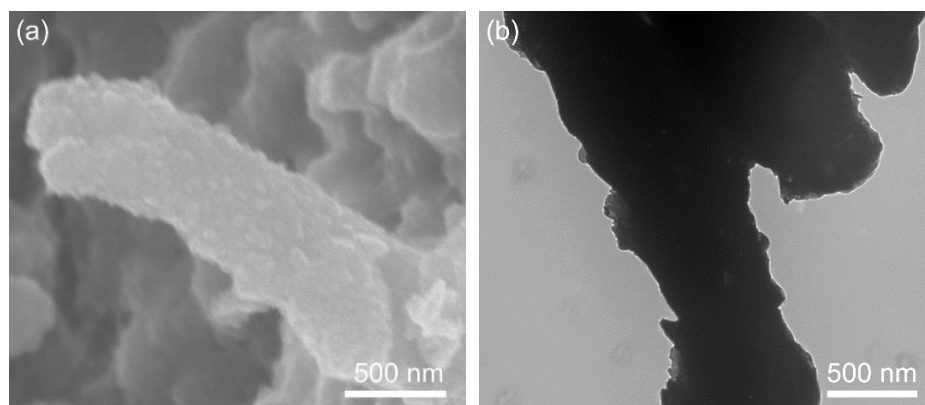

**Fig. S17** (a) SEM and (b) TEM images of the Fe<sub>2</sub>P@SnP<sub>0.94</sub>@MoS<sub>2</sub> composite after cycling 100 times at 2 A g<sup>-1</sup>.

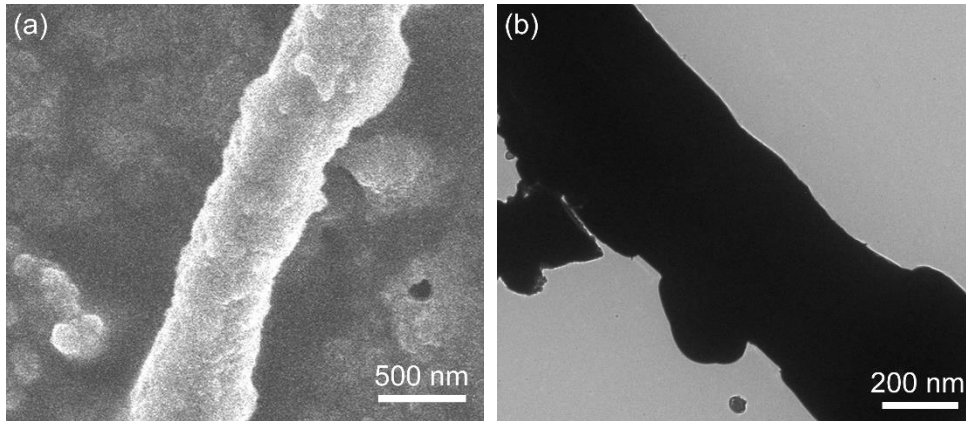

**Fig. S18** (a) SEM and (b) TEM images of  $\text{Fe}_2\text{P}@Sn\text{P}_{0.94}$  after cycling 100 times at  $2 \text{ A g}^{-1}$ .

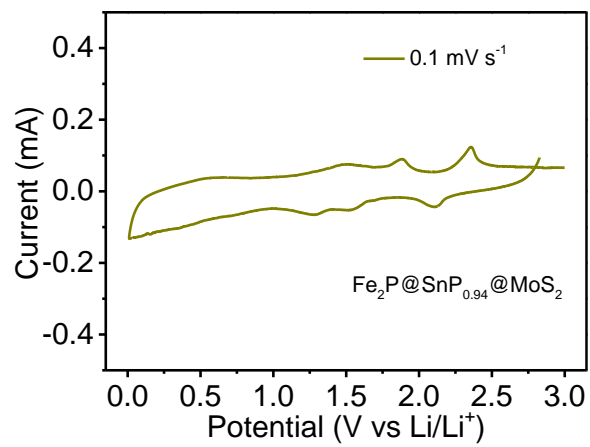

**Fig. S19** CV profile of  $\text{Fe}_2\text{P}@Sn\text{P}_{0.94}@MoS_2$  at  $0.1 \text{ mV s}^{-1}$  after cycling 100 times at  $2 \text{ A g}^{-1}$ .

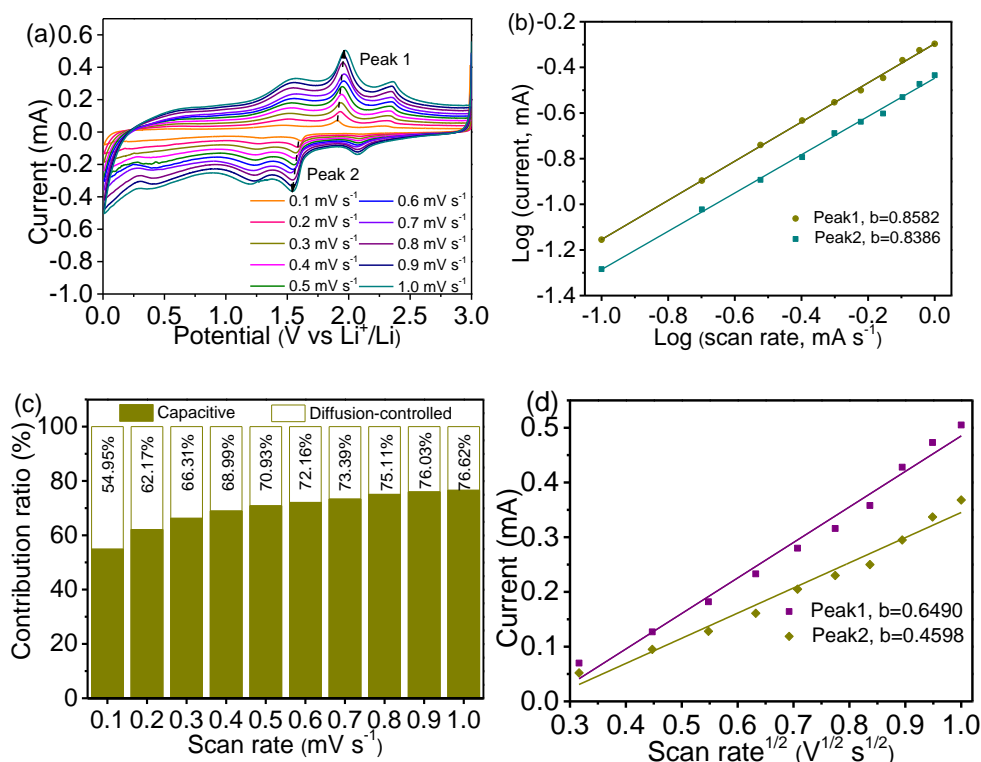

**Fig. S20** (a) CV profiles at different scanning speeds from 0.1 to 1.0 mV s<sup>-1</sup>. (b) Relationship of the log(*i*) vs. log(*v*). (c) Contribution ratios. (d) Peak currents vs. scan rate<sup>1/2</sup>.

**Table S1.** Comparison on the electrochemical performance of some anodes.

| Anode                                                              | Preparation method                | Cycling rate (mA g <sup>-1</sup> ) | Cycle number | Capacity (mAh g <sup>-1</sup> ) | Ref.       |
|--------------------------------------------------------------------|-----------------------------------|------------------------------------|--------------|---------------------------------|------------|
| Fe <sub>2</sub> P/C composite nanofibers                           | Electrospinning                   | 200                                | 300          | 573                             | 1          |
| Butyl-capped Ge gels and SnP <sub>0.94</sub> nanoparticles         | Vacuum annealing                  | 440                                | 200          | 500                             | 2          |
| Yolk-shell MoS <sub>2</sub> powders                                | Applying spray pyrolysis          | 1000                               | 100          | 651                             | 3          |
| SnO <sub>2</sub> /MoS <sub>2</sub>                                 | Hydrothermal method               | 1000                               | 230          | 602                             | 4          |
| MoS <sub>2</sub> @carbon                                           | Hydrothermal method               | 2000                               | 210          | 480                             | 5          |
| Graphene supported MoS <sub>2</sub> nanosheets                     | One-pot thermal annealing         | 150                                | 50           | 1010                            | 6          |
| MoS <sub>2</sub> @C                                                | Hydrothermal method/carbonization | 2000                               | 500          | 530                             | 7          |
| Ternary 1D Fe <sub>2</sub> P@SnP <sub>0.94</sub> @MoS <sub>2</sub> | Self-assembly and phosphorization | 2000                               | 800          | 797.5                           | This study |

## References

- 1 Y. Yang, W. B. Fu, C. Bell, D. C. Lee, M. Drexler, Y. Nuli, Z. F. M, A. Magasinski, G. Yushin and F. M. Alamgir, *ACS Appl. Mater. Interfaces*, 2021, **13**, 34074–34083.
- 2 M. G. Kim and J. Cho, *J. Electrochem. Soc.*, 2019, **156**, A277–A282.
- 3 Y. N. Ko, Y. C. Kang and S. B. Park, *Nanoscale*, **2014**, 6, 4508–4512.
- 4 Y. Chen, J. Lu, S. Wen, L. Lu and J. M Xue, *J. Mater. Chem. A*, 2014, **2**, 17857–17866.
- 5 R. Zhou, J. G. Wang, H. Z. Liu, H. Y. Liu, D. D. Jin, X. R. Liu, C. Shen, K. Y. Xie and B. Q. Wei, *Materials*, **2017**, 10, 174.
- 6 Q. H. Liu, Z. J. Wu, Z. L. Ma, S. Dou, J. H. Wu, L. Tao, X. Wang, C. B. Ouyang, A. L. Shen and S. Y. Wang, *Electrochim. Acta*, 2015, **177**, 298–303.
- 7 J. G. Wang, H. Y. Liu, R. Zhou, X. R. Liu and B.Q. Wei, *J. Power Sources*, 2019, **413**, 327–333.
